# Supplementary material
Source: PubMed Central journal article supplement (PMC7082641)
Supplement: DC190048SupplementaryData.pdf [file DC190048SupplementaryData.pdf]

SUPPLEMENTARY DATA

**Table S1.** Procedural codes for coronary interventions, peripheral arterial interventions, amputations, dialysis and renal transplantation.

|                                                           | <b>Before 1996</b>                                                                                                                                                                                 | <b>After 1996</b>                                                                                                                              |
|-----------------------------------------------------------|----------------------------------------------------------------------------------------------------------------------------------------------------------------------------------------------------|------------------------------------------------------------------------------------------------------------------------------------------------|
| <b>Coronary arteries</b>                                  | 30009, 30019, 30029, 30039, 30049, 30059, 30069, 30079, 30089, 30099, 30109, 30119, 30120, 30129, 30139, 30149, 30159, 30169, 30179, 30189, 30199, 30200, 30240, 30241, 30245, 30350, 30354, 30359 | KFNA 00-99, KFNB 00-99, KFNC 00-99, KFND 00-99, KFNE 00-99, KFNF 00-99, KFNG 00-99                                                             |
| <b>Peripheral arterial interventions</b>                  | 86785, 86799, 87074, 87075, 87076, 87081, 87289, 87375                                                                                                                                             | KPCE, KPCE, KPCH, KPCQ, KPBE, KPBF, KPBH, KPBQ, KPDE, KPDE, KPDH, KPDQ, KPEE, KPEF, KPEH, KPEQ, KPFE, KPFF, KPFH, KPFQ, KPAE, KPAF, KPAH, KPAQ |
| <b>Intracranial interventions</b><br>(none in the cohort) |                                                                                                                                                                                                    | KAAL10, KAAL11                                                                                                                                 |
| <b>Amputations</b>                                        | 81031, 81041, 81050, 81053, 81054, 81055                                                                                                                                                           | KNFQ09, KNFQ19, KNGQ09, KNGQ19, KNHQ00-17                                                                                                      |
| <b>Dialysis and renal transplantation</b>                 | 57480, 57490, 87409, 87430, 92660, 94300, 94340                                                                                                                                                    | BJFD2, KKAS00, KKAS10, KKAS20                                                                                                                  |

SUPPLEMENTARY DATA

**Table S2.** Clinical characteristics in the 1159 individuals with type 1 diabetes divided according to groups of albuminuria

|                                   | Normoalbuminuria | Microalbuminuria | Macroalbuminuria | p      |
|-----------------------------------|------------------|------------------|------------------|--------|
| Number of participants            | 511              | 164              | 484              |        |
| Female, n (%)                     | 244 (47.8)       | 61 (37.4)        | 186 (38.6)       | 0.005  |
| Age (years)                       | 45.7 ± 12.8      | 55.3 ± 12.9      | 44.3 ± 12.0      | 0.11   |
| Diabetes duration (years)         | 23.9 ± 12.6      | 32.4 ± 15.0      | 29.1 ± 9.8       | <0.001 |
| History of CVD, n (%)             | 25 (4.9)         | 39 (28.8)        | 61 (13.9)        | <0.001 |
| eGFR (ml/min/1.73m <sup>2</sup> ) | 100 ± 16.2       | 88 ± 21.4        | 77 ± 30.6        | <0.001 |
| UAER (mg/24-hour)                 | 7 (5-12)         | 25 (13-55)       | 469 (188-1311)   | <0.001 |
| Systolic blood pressure (mmHg)    | 132 ± 18         | 135 ± 17         | 143 ± 22         | <0.001 |
| Diastolic blood pressure (mmHg)   | 76 ± 9           | 74 ± 9           | 81 ± 12          | <0.001 |
| HbA <sub>1c</sub> (mmol/mol)      | 66 ± 12.0        | 67 ± 13.5        | 78 ± 16.0        | <0.001 |
| HbA <sub>1c</sub> (%)             | 8.2 ± 1.1        | 8.3 ± 1.2        | 9.3 ± 1.5        | <0.001 |
| Total cholesterol (mmol/l)        | 4.8 ± 0.93       | 4.8 ± 0.93       | 5.5 ± 1.18       | <0.001 |

SUPPLEMENTARY DATA

|                                 |                  |                  |                   |        |
|---------------------------------|------------------|------------------|-------------------|--------|
| BMI (kg/m <sup>2</sup> )        | 24.3 ± 3.2       | 25.6 ± 3.9       | 24.6 ± 3.6        | 0.20   |
| Smokers, n (%)                  | 183 (36.0)       | 36 (22.0)        | 199 (44.0)        | <0.001 |
| Trimethylamine N-oxide (μmol/L) | 5.13 (3.49-8.21) | 4.98 (3.65-7.84) | 7.12 (4.47-14.08) | <0.001 |

Data represents n (%), mean ± SD or median (IQR). P values are for trend across groups.

CVD; Cardiovascular disease, eGFR; estimated Glomerular Filtration Rate, UAER; Urinary albumin excretion rate, BMI; Body mass index.
